# Supplementary material for: Methane capture with α-cyclodextrins
Source: Royal Society of Chemistry journal article supplement (doi:10.1039/d3nj01843a), 2023-01-01

# Supporting information for

---

## Methane capture with $\alpha$ -cyclodextrins

by Cecilie Høgfældt Jessen, Jesper Bendix, Theis Brock Nannestad, Heloisa Bordallo, Martin Jæger Pedersen,  
Christian Marcus Pedersen and Mikael Bols\*

Department of Chemistry & Niels Bohr Institute, University of Copenhagen, 2100 København Ø, Denmark,  
email: bols@chem.ku.dk

### *Contents*

|                                                                                                                   |      |
|-------------------------------------------------------------------------------------------------------------------|------|
| Figure S1. VIS spectra of <b>4</b> (40 $\mu$ M) at pH 7 in the presence of increasing concentration of <b>1</b> . | 2    |
| Figure S2. Benesi Hildebrand plot for determining $K_d$ between <b>1</b> and <b>4</b>                             | 2    |
| Figure S3. VIS spectra of <b>4</b> (40 $\mu$ M) at pH 7 in the presence of increasing concentration of <b>5</b>   | 3    |
| Figure S4. Plot for determination of $K_d$ between <b>5</b> and <b>4</b>                                          | 3    |
| Figure S5. Figure S3. Specifications of pressure cell.                                                            | 4    |
| 800 MHz NMR spectra of <b>5</b>                                                                                   | 5-10 |

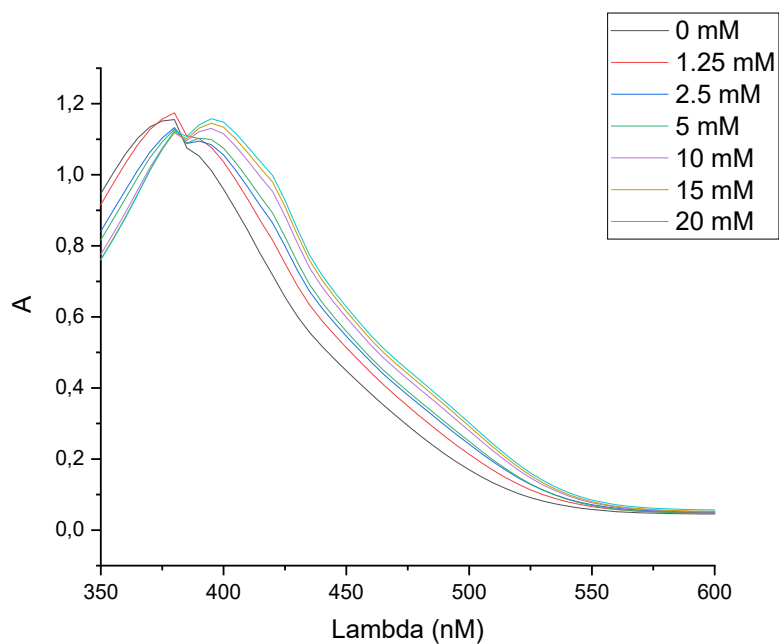

Figure S1. VIS spectra of **4** (40  $\mu\text{M}$ ) at pH 7 in the presence of increasing concentration of **1**.

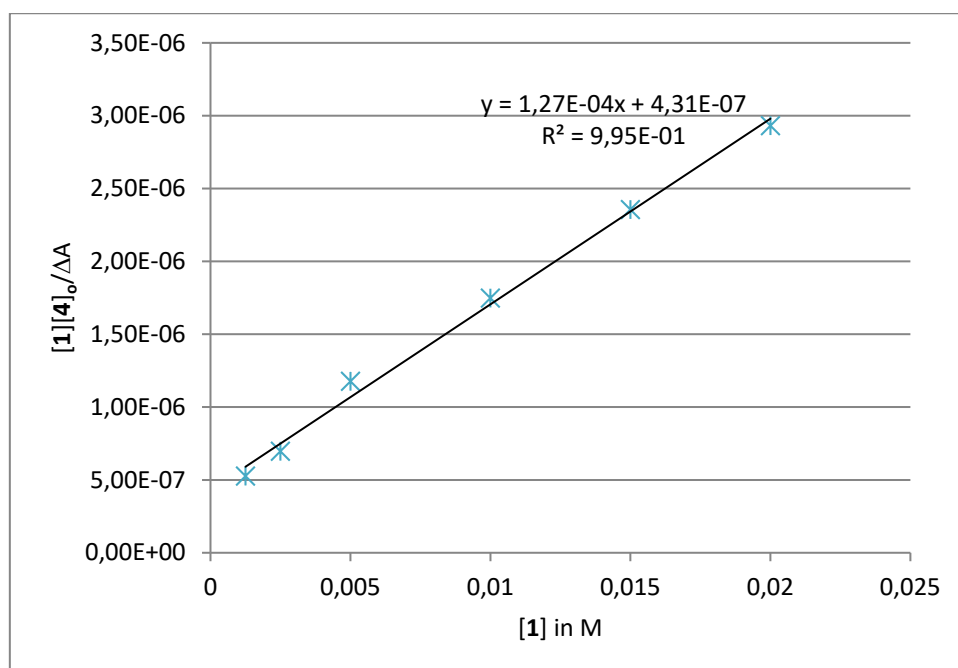

Figure S2. Benesi Hildebrand plot of **4** (40  $\mu\text{M}$ ) at pH 7 in the presence of increasing concentration of **1** at  $\lambda = 425 \text{ nm}$ . From slope ( $a = 1.27 \times 10^{-4}$ ) and intersection ( $b = 4.31 \times 10^{-7}$ )  $K_d$  is determined as  $b/a = 3.39 (\pm 0.41) \times 10^{-3} \text{ M}$

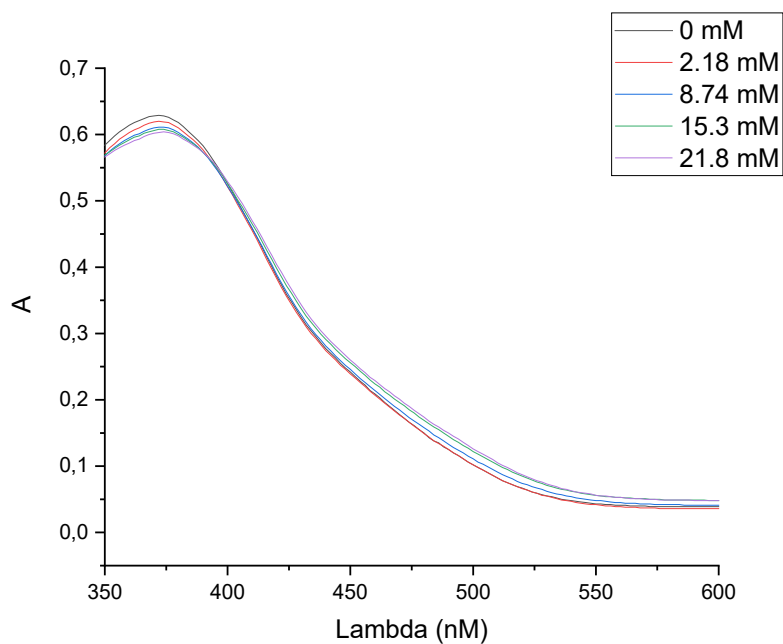

*Figure S3.* VIS spectra of **4** (40  $\mu$ M) at pH 7 in the presence of increasing concentration of **5**.

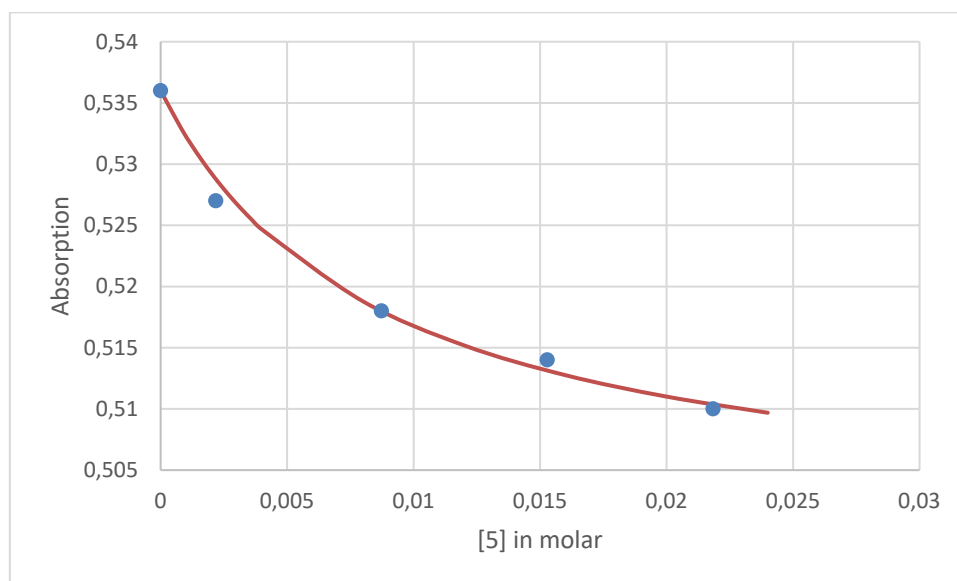

*Figure S4.* Non linear regression fit (red curve) of the absorption data (blue) of **4** (40  $\mu$ M) at pH 7 at  $\lambda = 370$  nm in the presence of increasing concentration of **5**. Fitting to the equation  $A = k_1/([5]+K_d) + k_2$  gave  $K_d = 8.62 (\pm 2.50) \times 10^{-3}$  M with a  $r^2 = 0.99$

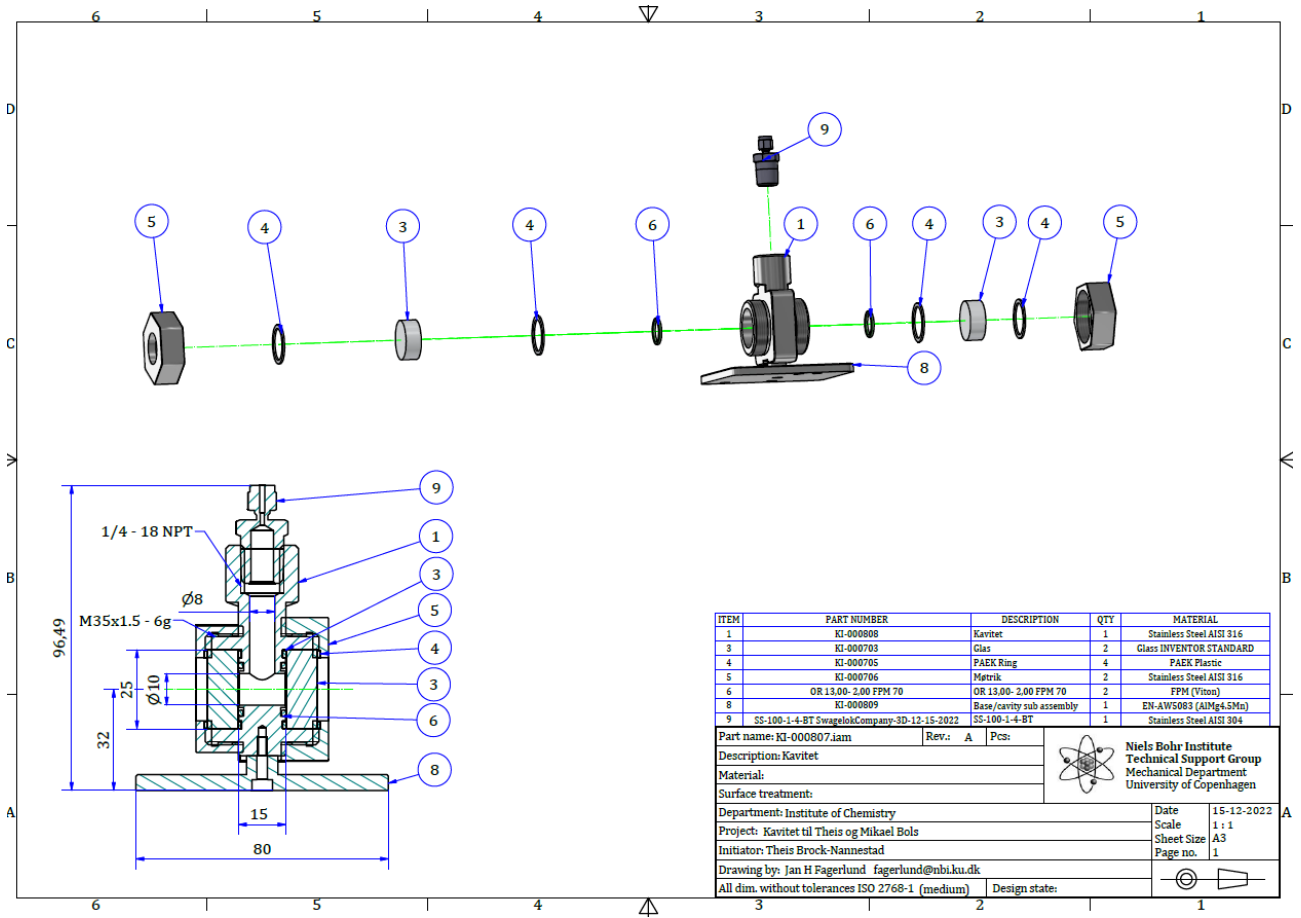

Figure S5. Specifications of pressure cell.

<sup>1</sup>H NMR (800 MHz; D<sub>2</sub>O) of 5

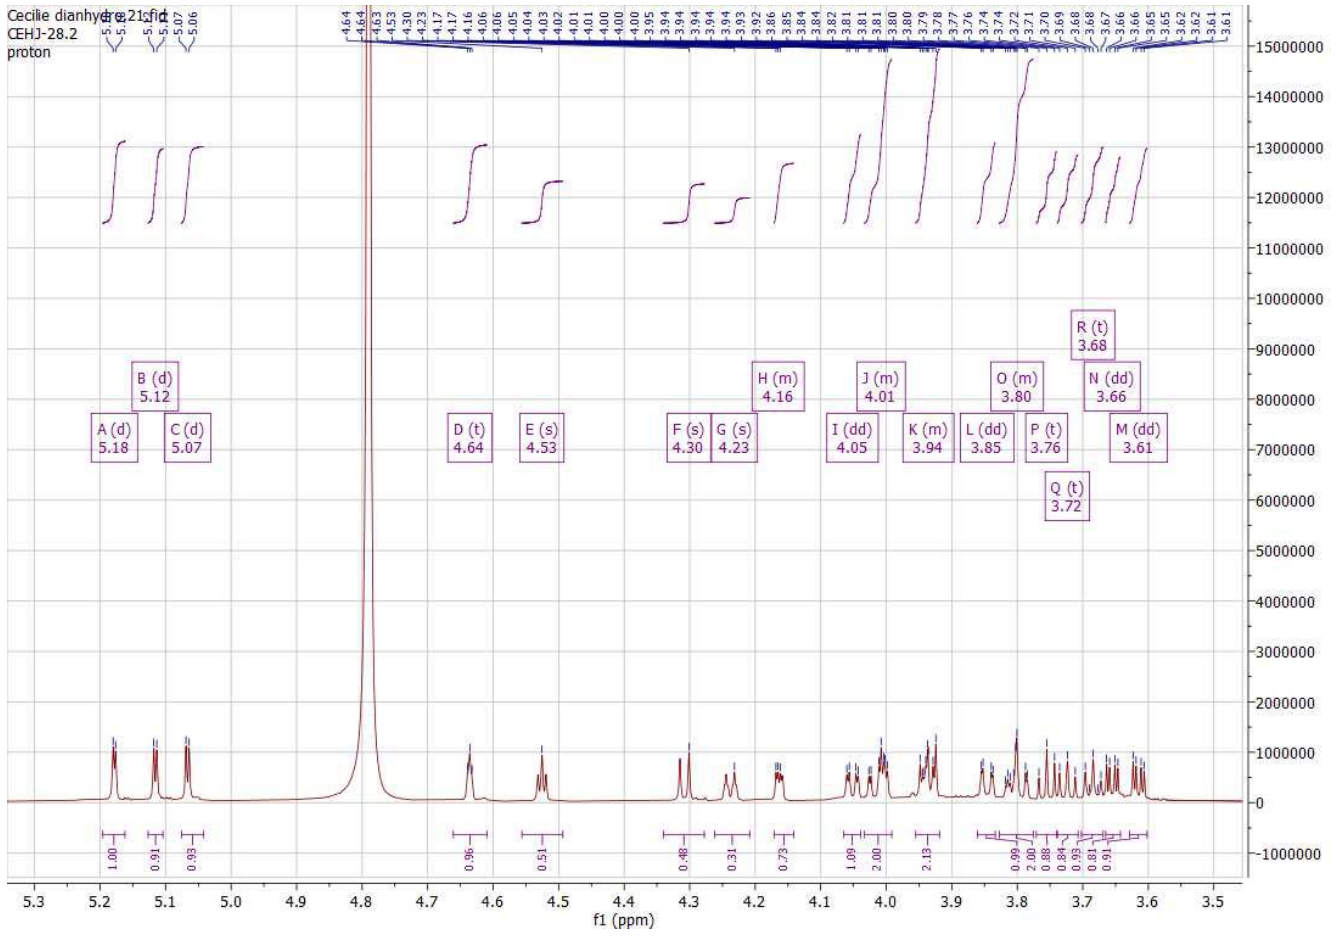

$^{13}\text{C}$  NMR (800 MHz;  $\text{D}_2\text{O}$ ) of **5**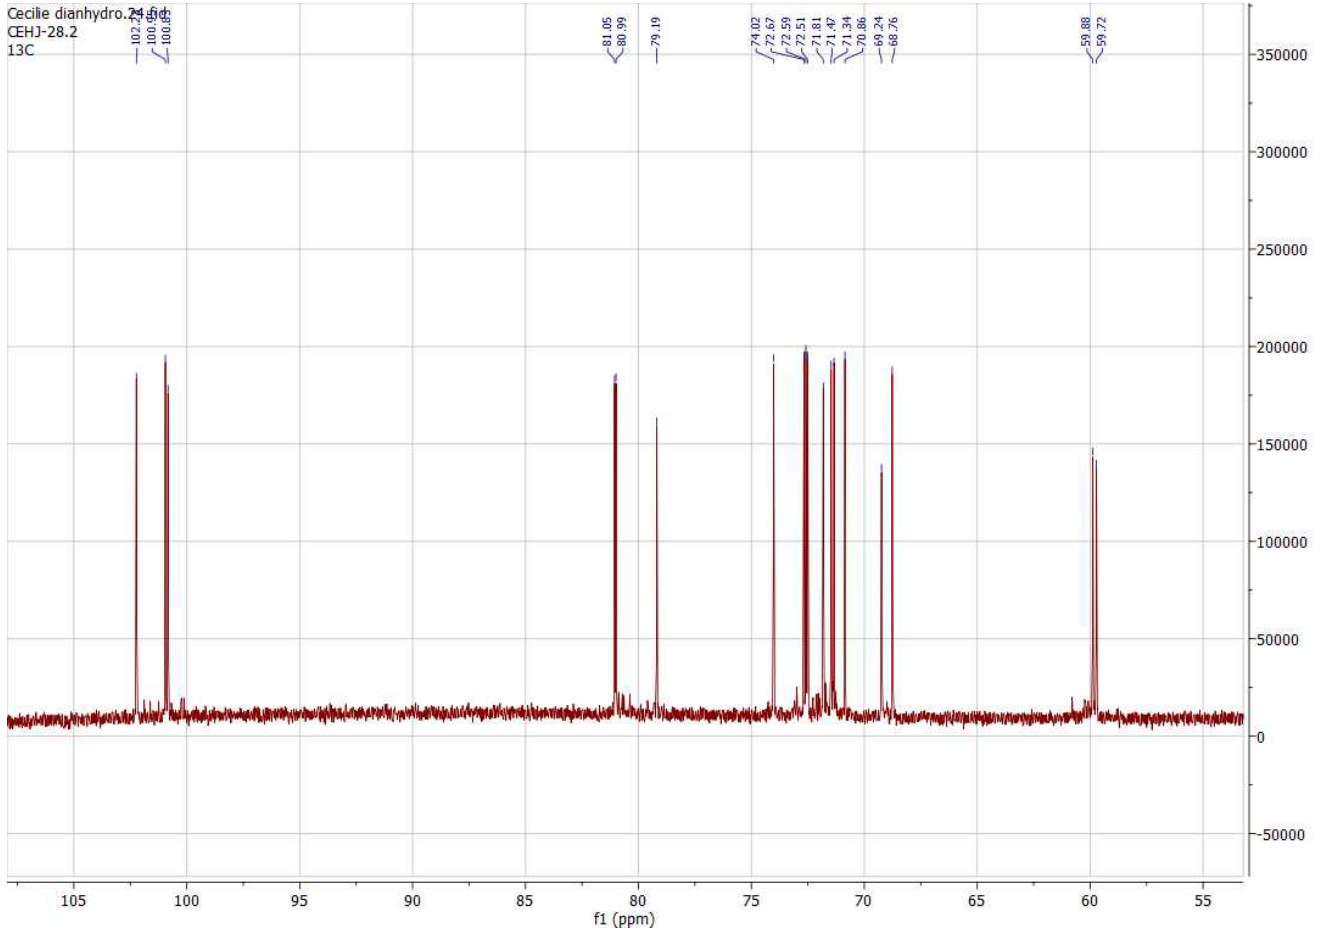

Cosy (800 MHz; D<sub>2</sub>O) of 5

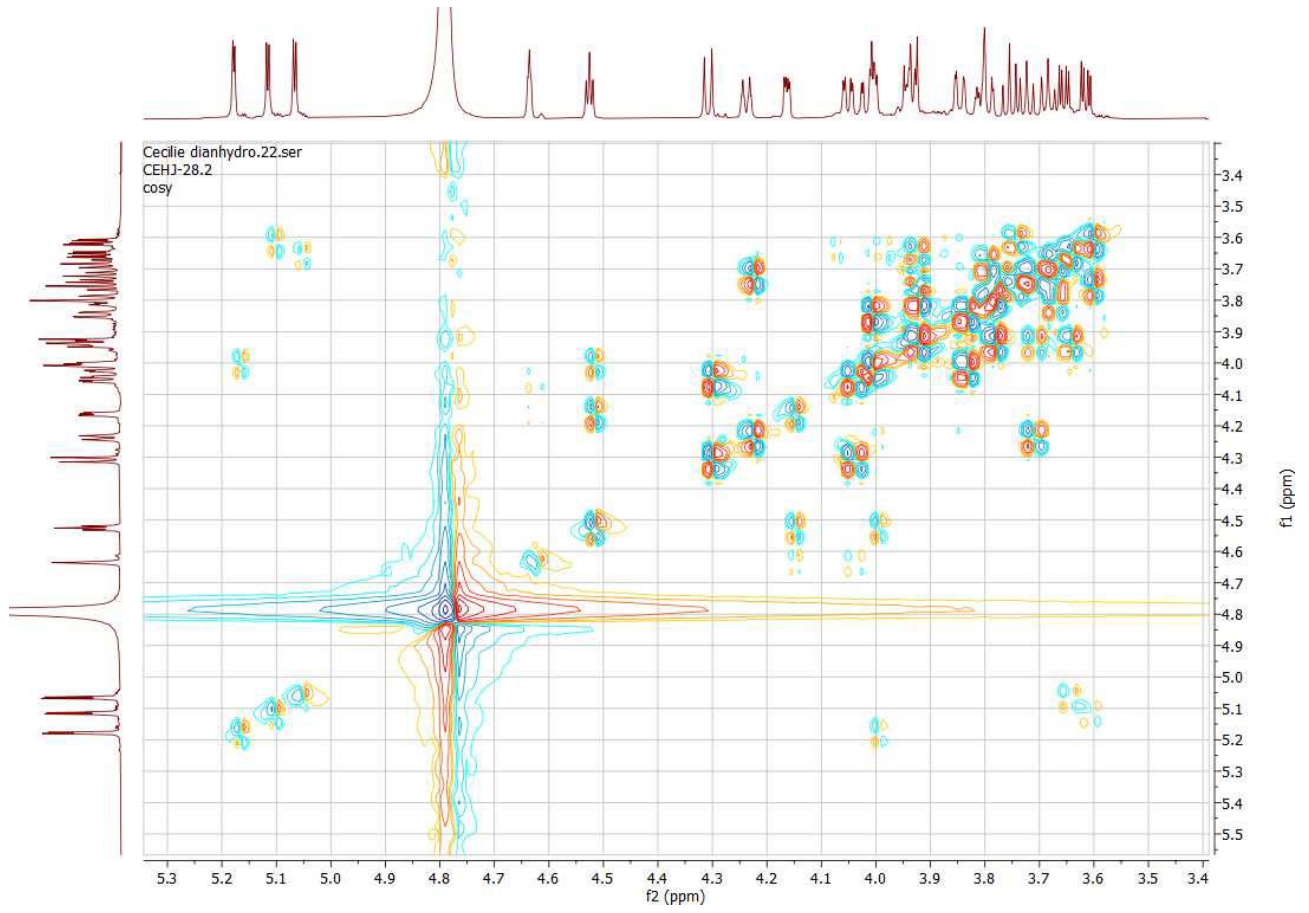

HSQC (800 MHz; D<sub>2</sub>O) of 5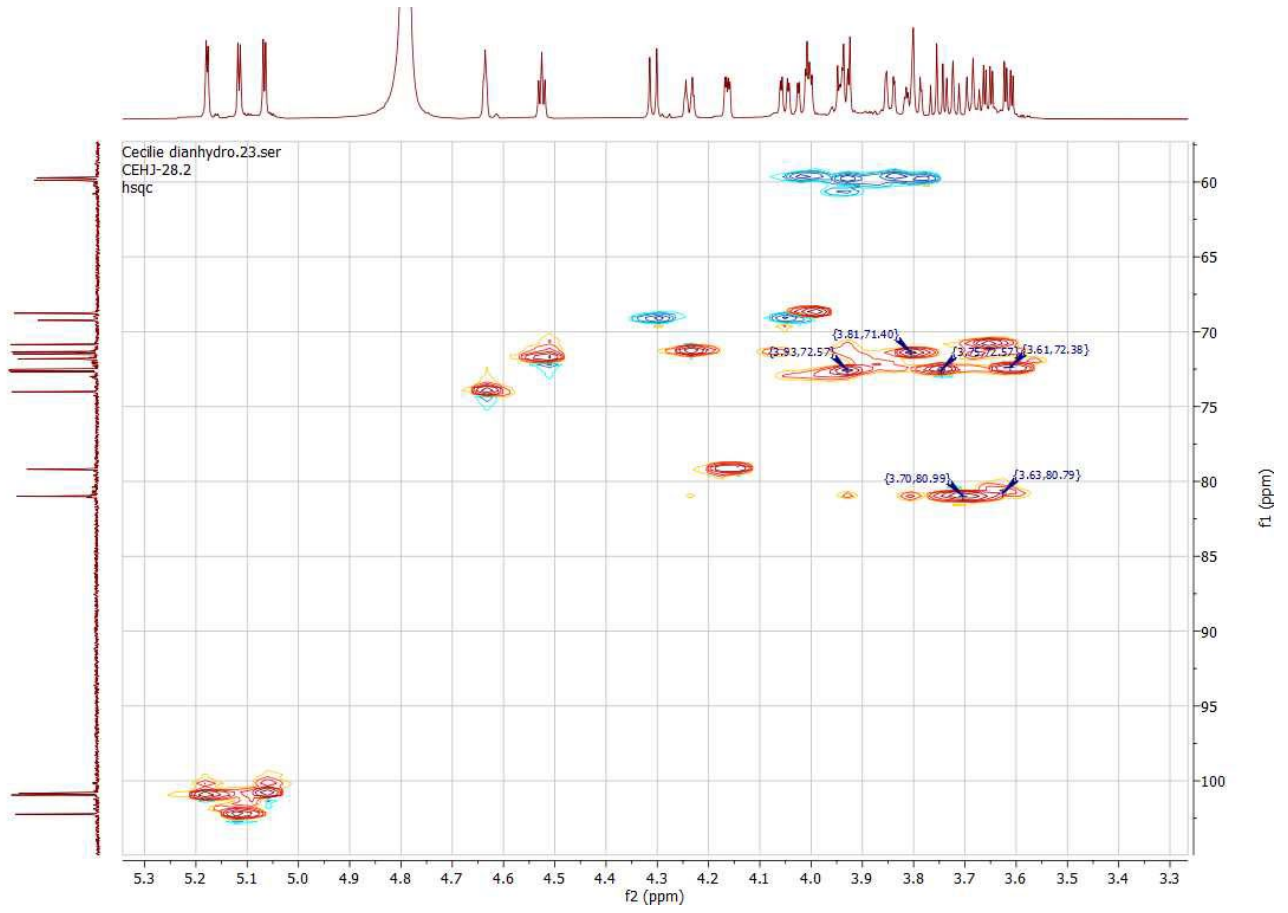



HSQC-Tocsy (800 MHz; D<sub>2</sub>O) of 5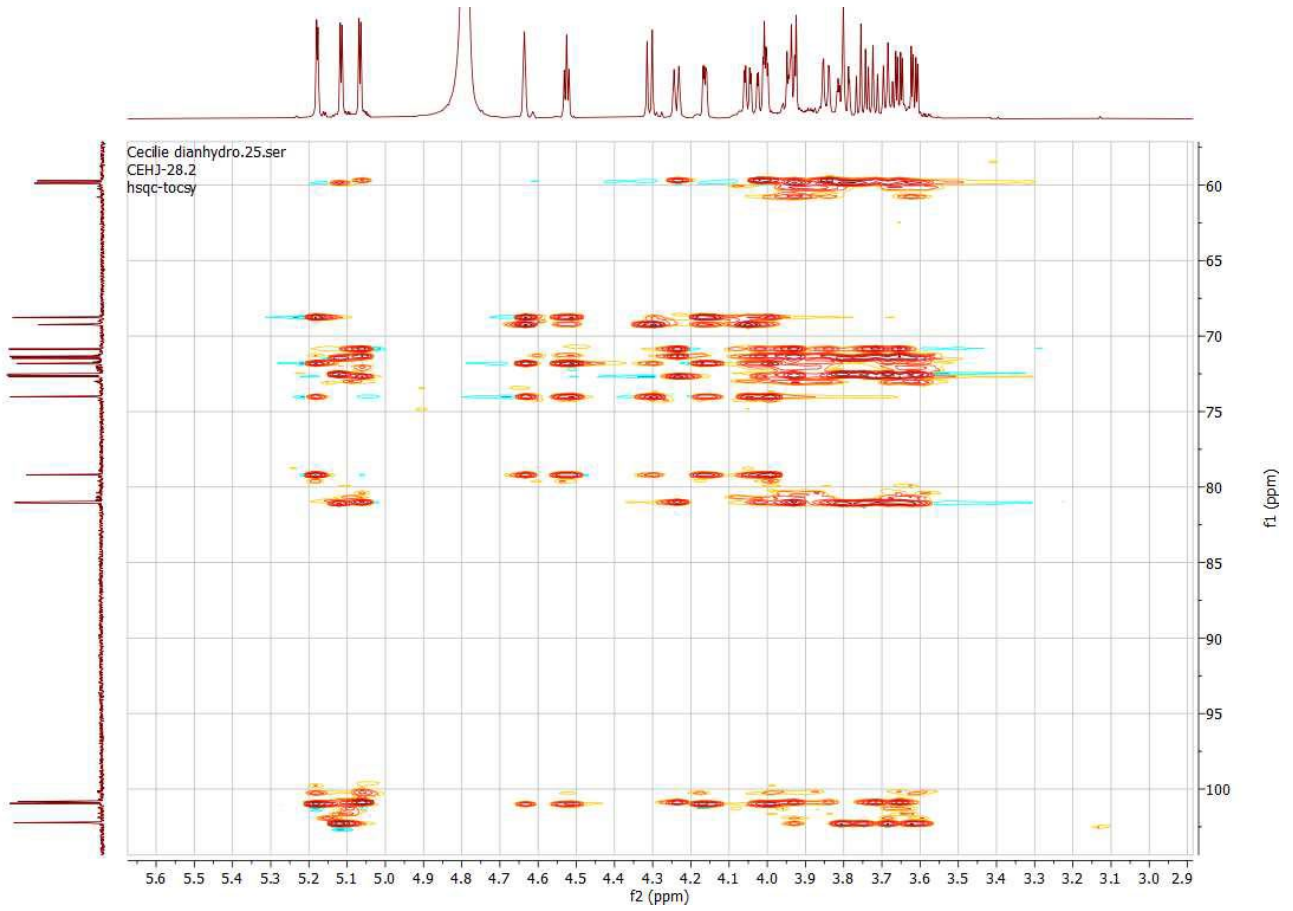

Roesy (800 MHz; D<sub>2</sub>O) of 5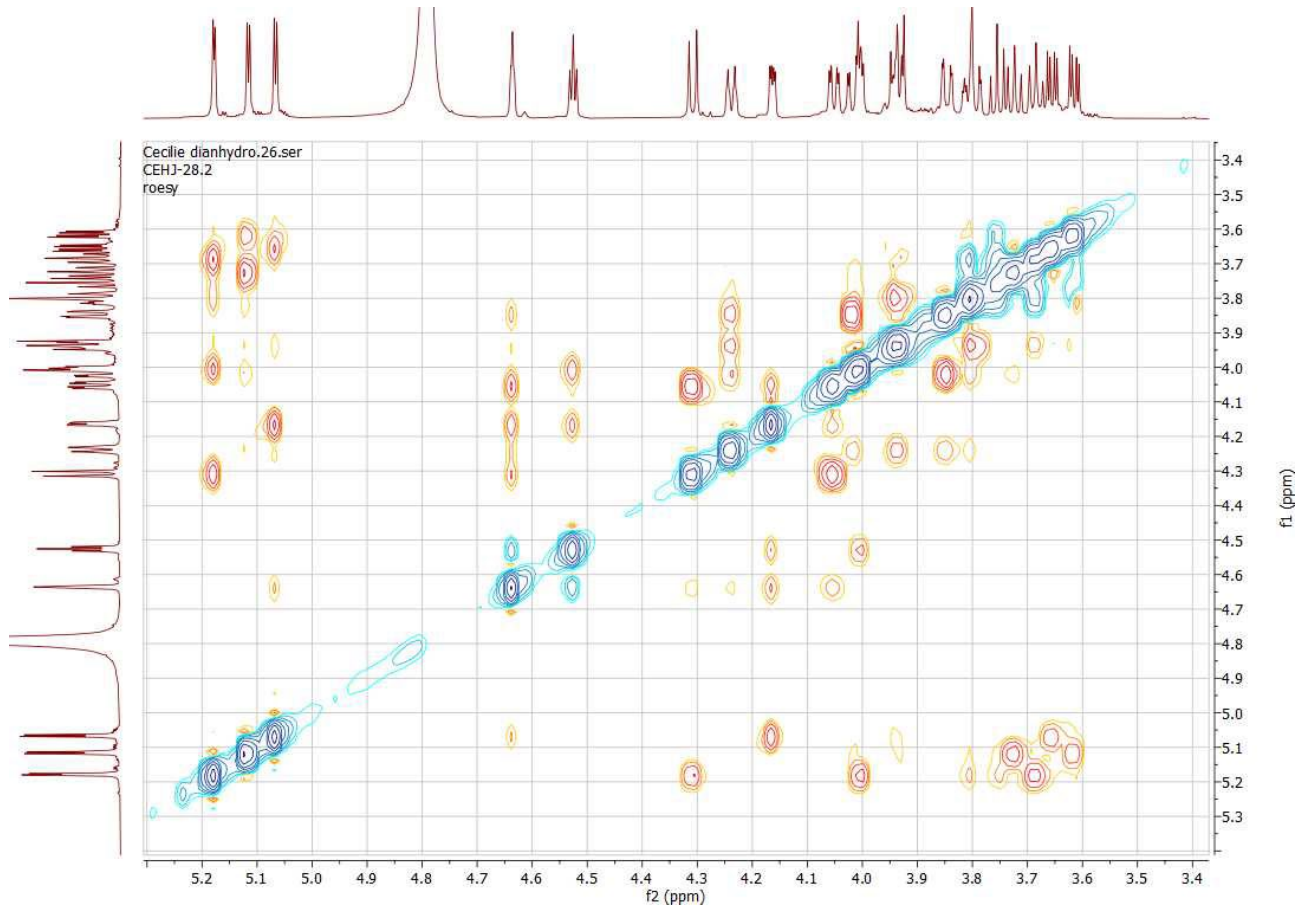

Supplement: d3nj01843a1.pdf [file d3nj01843a1.pdf]
