# Supplementary material for: Methane capture with α-cyclodextrins
Source: Royal Society of Chemistry journal article supplement (doi:10.1039/d3nj01843a), 2023-01-01
Supplement: d3nj01843a2.pdf [file d3nj01843a2.pdf]

**Table S1 Crystal data and structure refinement for  $\alpha$ -CD·CH<sub>4</sub>·4.98H<sub>2</sub>O**

|                                                         |                                                                 |
|---------------------------------------------------------|-----------------------------------------------------------------|
| <b>CCDC deposition number</b>                           | CCDC_2247021                                                    |
| <b>Empirical formula</b>                                | C <sub>37</sub> H <sub>73.7</sub> O <sub>34.85</sub>            |
| <b>Formula weight</b>                                   | 1068.49                                                         |
| <b>T/K</b>                                              | 100(2)                                                          |
| <b>Crystal system</b>                                   | orthorhombic                                                    |
| <b>Space group</b>                                      | P2 <sub>1</sub> 2 <sub>1</sub> 2 <sub>1</sub>                   |
| <b>a/Å</b>                                              | 9.3540(11)                                                      |
| <b>b/Å</b>                                              | 14.3606(18)                                                     |
| <b>c/Å</b>                                              | 37.141(5)                                                       |
| <b><math>\alpha</math>/°</b>                            | 90                                                              |
| <b><math>\beta</math>/°</b>                             | 90                                                              |
| <b><math>\gamma</math>/°</b>                            | 90                                                              |
| <b>Volume/Å<sup>3</sup></b>                             | 4989.1(11)                                                      |
| <b>Z</b>                                                | 4                                                               |
| <b><math>\rho_{\text{calc}}/\text{cm}^3</math></b>      | 1.423                                                           |
| <b><math>\mu/\text{mm}^{-1}</math></b>                  | 0.128                                                           |
| <b>F(000)</b>                                           | 2271.0                                                          |
| <b>Crystal size/mm<sup>3</sup></b>                      | 0.29 × 0.22 × 0.13                                              |
| <b>Radiation</b>                                        | MoK $\alpha$ ( $\lambda$ = 0.71073)                             |
| <b>2<math>\theta</math> range for data collection/°</b> | 4.386 to 66.282                                                 |
| <b>Index ranges</b>                                     | -12 ≤ h ≤ 14, -20 ≤ k ≤ 22, -51 ≤ l ≤ 57                        |
| <b>Reflections collected</b>                            | 57921                                                           |
| <b>Independent reflections</b>                          | 18978 [ $R_{\text{int}}$ = 0.0424, $R_{\text{sigma}}$ = 0.0507] |
| <b>Data/restraints/parameters</b>                       | 18978/2/705                                                     |
| <b>Goodness-of-fit on F<sup>2</sup></b>                 | 1.043                                                           |
| <b>Final R indexes [<math>I \geq 2\sigma(I)</math>]</b> | $R_1$ = 0.0511, $wR_2$ = 0.1326                                 |
| <b>Final R indexes [all data]</b>                       | $R_1$ = 0.0644, $wR_2$ = 0.1408                                 |
| <b>Largest diff. peak/hole / e Å<sup>-3</sup></b>       | 1.86/-0.40                                                      |
| <b>Flack parameter</b>                                  | -0.1(2)                                                         |
